# Supplementary figures and images for: Subcutaneous checkpoint inhibition is equivalent to systemic delivery when combined with nelitolimod delivered via pressure-enabled drug delivery for depletion of intrahepatic myeloid-derived suppressor cells and control of liver metastases
Source: HighWire-hosted journal article supplement (doi:10.1136/jitc-2024-008837), 2024-07-01

### A Gating Strategy

#### MDSC

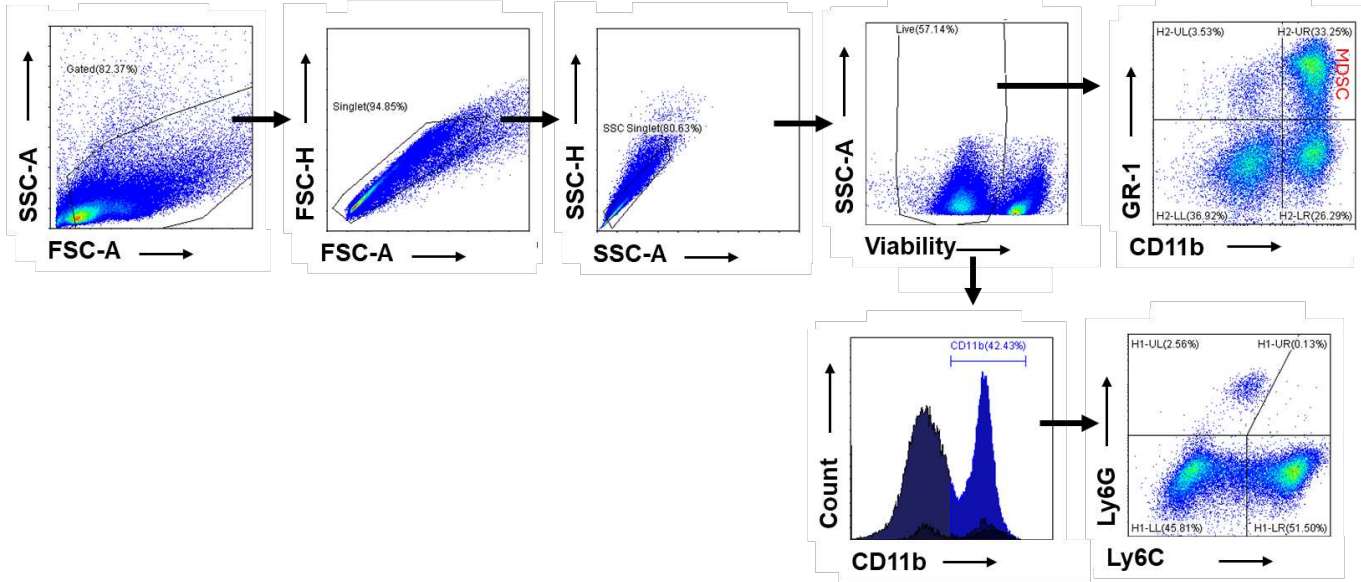

#### Dendritic Cells

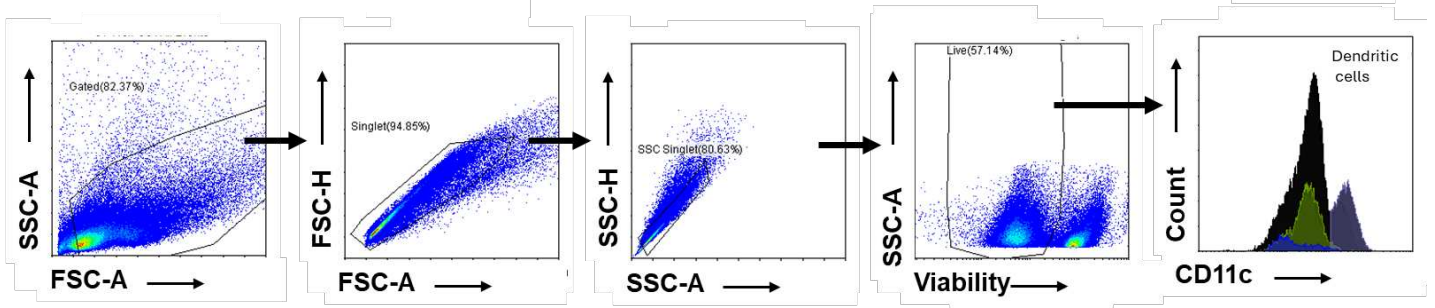

#### B and T cells

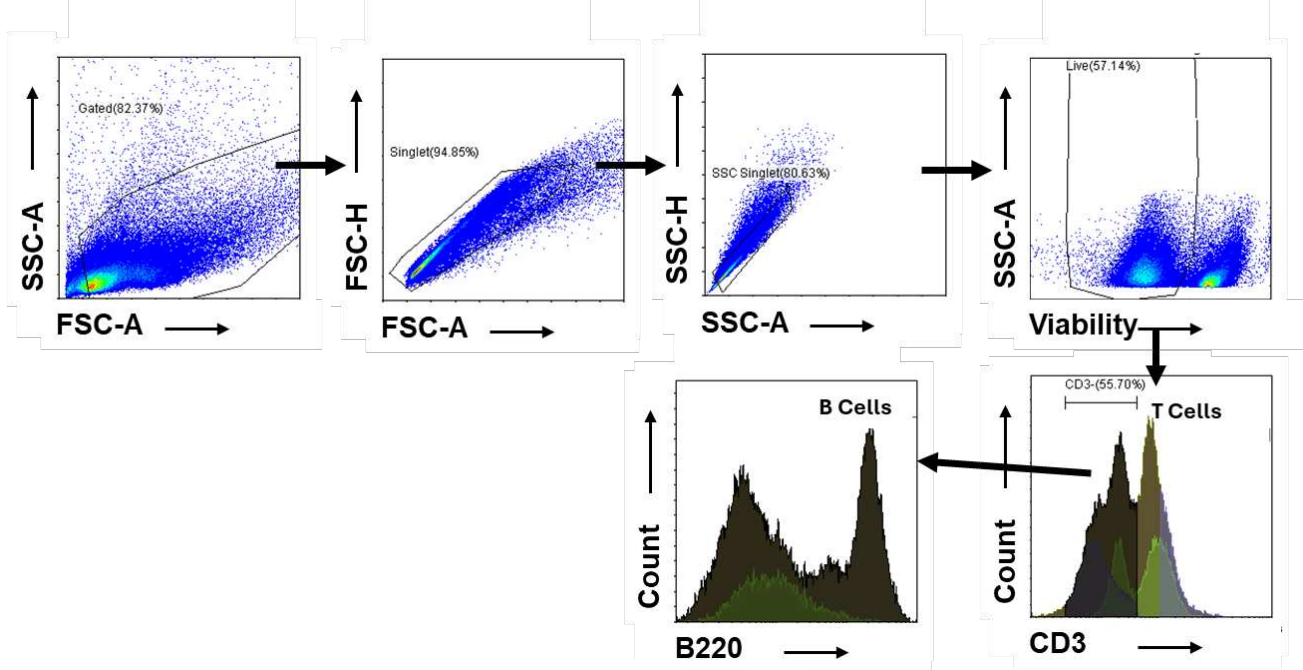

#### M1-like and M2-like macrophages

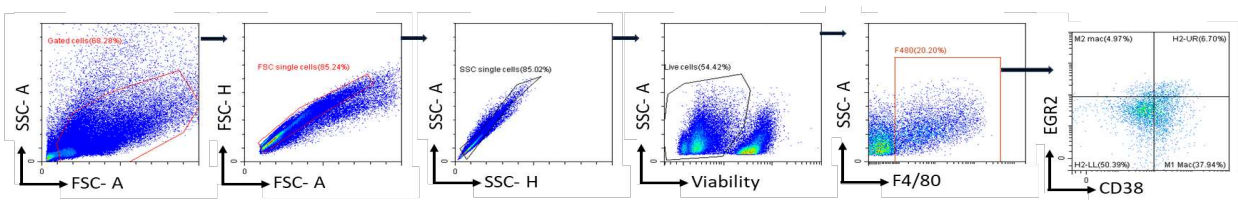

### B

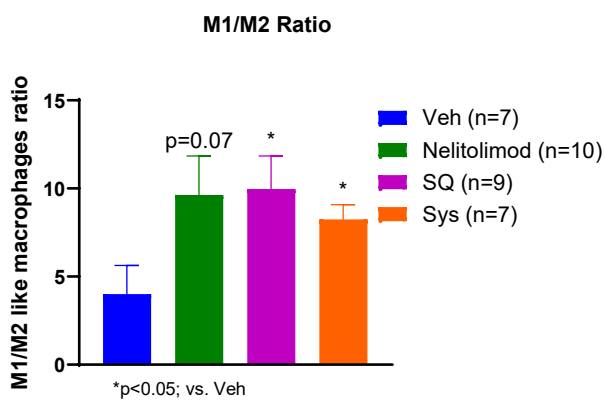

Supplement: jitc-2024-008837supp002_data_supplement.pdf [file jitc-2024-008837supp002_data_supplement.pdf]
